# Supplementary material
Source: publisher figshare collection journal article supplement (https://frontiersin.figshare.com/ndownloader/files/31602116)
Supplement: Supplementary file [file 31602116]

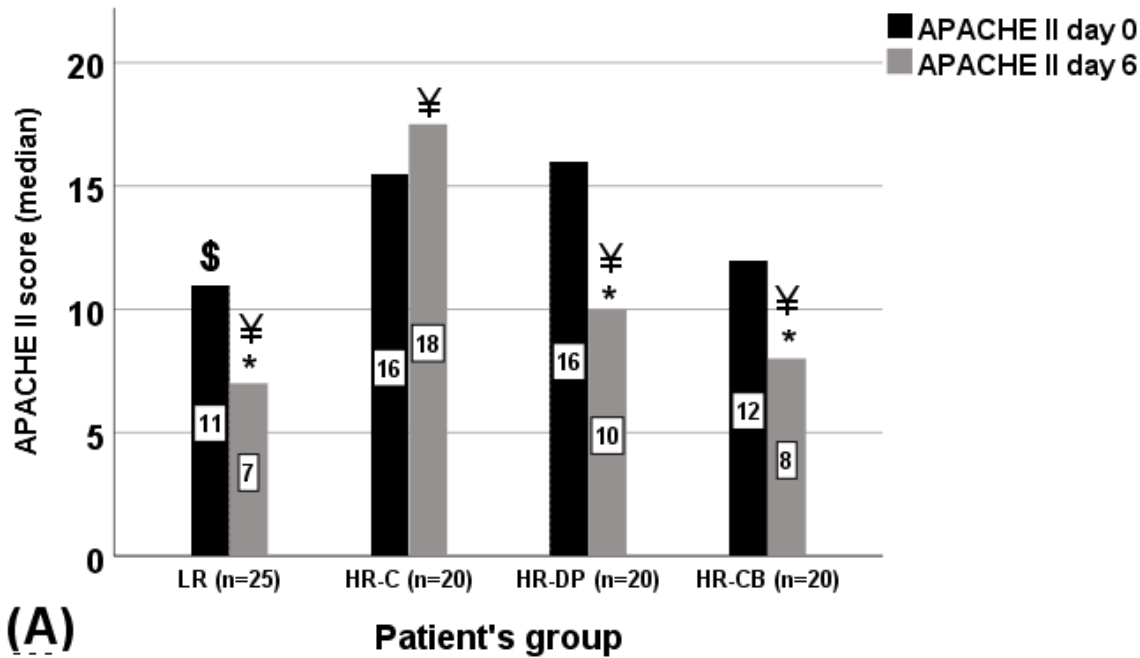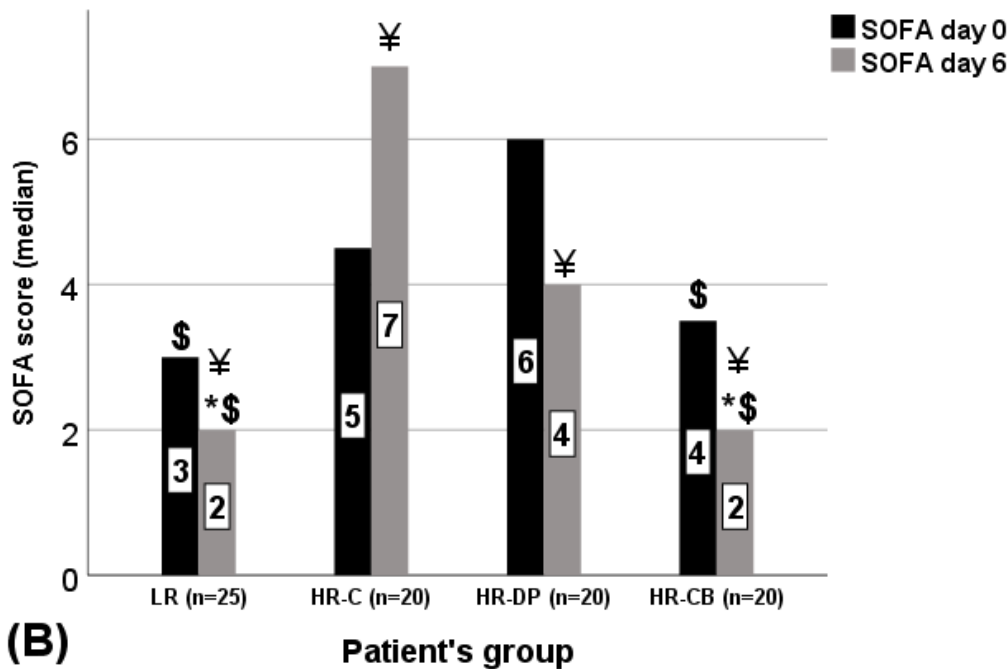

Supplementary Figure S1: APACHE II and SOFA scores on day 0 and day 6 in the tested groups, **(A):** APACHE II score on day 0 and day 6, **(B):** SOFA score on day 0 and day 6

**LR:** low risk for sepsis group, **HR-C:** high risk for sepsis control group, **HR-DP:** high risk for sepsis vitamin D and probiotics group, **HR-CB:** high risk for sepsis vitamin C and vitamin B1 group, **APACHE II:** Acute Physiologic Assessment and Chronic Health Evaluation score second version. **SOFA:** Sequential Organ Failure Assessment score. **Data are median (interquartile range).** \* = Significant with HR-C, \$ = significant with HR-DP. ¥ = Significant difference between day 0 and day 6 score within the same group. Significance level at  $p \leq 0.05$
